# Supplementary material for: Comparison of the conformation of floral odorants: an NMR and molecular dynamics study
Source: Royal Society of Chemistry journal article supplement (doi:10.1039/b205255e), 2002-01-01
Supplement: b205255e.pdf [file b205255e.pdf]

## Supplementary data

Chemical shifts ( $\delta$ ) and coupling constants (J) in  $\text{CDCl}_3$  and  $[\text{}^2\text{H}_6]\text{DMSO}$  of relevant protons in compounds **1-4**

| Compound       | Proton | $\text{CDCl}_3$ |                                                  | $[\text{}^2\text{H}_6]\text{DMSO}$ |                        |
|----------------|--------|-----------------|--------------------------------------------------|------------------------------------|------------------------|
|                |        | $\delta$ /ppm   | J/ Hz                                            | $\delta$ /ppm                      | J/ Hz                  |
| <b>1-Trans</b> | H-2    | 5.28            | $J_{2,3}=2.0$<br>$J_{2,3'}=5.0$                  | 5.21                               | $J_{2,3}=4.0$          |
|                | H-6    | 3.47            | $J_{6,7}=11.6$                                   | 3.38                               | $J_{6,7}=11.2$         |
|                | H-9    | 1.24            | $J_{8,9}=11.4$                                   | 1.28                               | $J_{8,9}=11.3$         |
| <b>1-Cis</b>   | H-2    | 5.23            | $J_{2,3}=2.0$<br>$J_{2,3'}=3.7$                  | 5.16                               | $J_{2,3}=4.1$          |
|                | H-6    | 3.74            | $J_{6,7}=3.4$                                    | 3.68                               | $J_{6,7}=3.1$          |
|                | H-9    | 1.32            | $J_{8,9}=11.7$                                   | 1.30                               | $J_{8,9}=11.5$         |
| <b>2-Trans</b> | H-2    | 4.71            | $J_{2,3\text{eq}}=2.6$<br>$J_{2,3\text{ax}}=4.5$ | 4.67                               | $J_{2,3\text{ax}}=4.5$ |
|                | H-7    | 3.50            | $J_{7,8}=12.2$                                   | 3.38                               | $J_{7,8}=11.8$         |
|                | H-10   | 1.23            | $J_{9,10}=11.6$                                  | 1.25                               | $J_{9,10}=11.4$        |
| <b>2-Cis</b>   | H-2    | 4.65            | $J_{2,3\text{eq}}=3.1$<br>$J_{2,3\text{ax}}=3.6$ | 4.63                               | $J_{2,3\text{ax}}=4.1$ |
|                | H-7    | 3.82            | $J_{7,8}=3.2$                                    | 3.75                               | $J_{7,8}=2.9$          |
|                | H-10   | 1.28            | $J_{9,10}=11.0$                                  | 1.26                               | $J_{9,10}=11.2$        |
| <b>3</b>       | H-2    | 5.78            | $J_{2,3}=4.8$                                    | 5.77                               | $J_{2,3}=4.2$          |
| <b>4</b>       | H-2    | 5.31            | $J_{2,3}=3.1$                                    | 5.38                               | $J_{2,3}=3.0$          |

Selected NOEs in compounds **1-4** (0.1 mol dm<sup>-3</sup> in CDCl<sub>3</sub> and [2H<sub>6</sub>]DMSO, *T* = 298 K)

| Compound       | CDCl <sub>3</sub> |          |        | [2H <sub>6</sub> ]DMSO |        |      |
|----------------|-------------------|----------|--------|------------------------|--------|------|
|                | Irradiated        | observed | NOE %  | observed               | NOE %  |      |
| <b>1-Trans</b> | H-2               | H-6      | 6.6    | H-6                    | 10.9   |      |
|                | H-6               | H-2      | 6.3    | H-2                    | 7.6    |      |
| <b>1 Cis</b>   | H-2               | H-6      | 4.1    | H-6                    | 1.9    |      |
|                | H-6               | H-2      | 6.5    | H-2                    | 2.8    |      |
| <b>2-Trans</b> | H-2               | H-7      | 12.1   | H-7                    | 11.2   |      |
|                | H-7               | H-2      | 8.9    | H-2                    | 6.3    |      |
| <b>2-Cis</b>   | H-2               | H-7      | 4.0    | H-7                    | 6.0    |      |
|                | H-7               | H-2      | 4.6    | H-2                    | 3.6    |      |
| <b>3</b>       | H-8,8'            | H-7,7'   | 10.3   | H-7,7'                 | 16.3   |      |
|                |                   | H-10     | 3.9    | H-2                    | -2.0   |      |
|                | H-7,7'            | H-11,11' | 5.2    | H-10                   | 5.9    |      |
|                |                   | H-8,8'   | 10.3   | H-8,8'                 | 18.8   |      |
|                | H-2               | H-2      | 5.2    | H-2                    | 7.7    |      |
|                |                   | H-7,7'   | 10.7   | H-8,8'                 | -3.9   |      |
|                |                   | H-7,7'   |        | H-7,7'                 | 17.4   |      |
|                |                   | H-10     | H-8,8' | 5.0                    | H-8,8' | 8.5  |
|                | <b>4</b>          | H-9,9'   | H-8,8' | 17.3                   | H-7,7' | -3.4 |
|                |                   |          | H-8,8' |                        | H-8,8' | 26.4 |
| H-8,8'         |                   | H-2      |        | H-2                    | -1.1   |      |
|                |                   | H-9,9'   | 11.2   | H-9,9'                 | 23.6   |      |
| H-2            |                   | H-2      | 4.6    | H-2                    | 5.0    |      |
|                | H-8,8'            | 6.3      | H-8,8' | 6.9                    |        |      |
|                |                   | H-9,9'   | -1.8   |                        |        |      |
